# Supplementary material for: ALD-made noble metal high entropy alloy nanofilm with sub-surface amorphization for enhanced hydrogen evolution
Source: Royal Society of Chemistry journal article supplement (doi:10.1039/d3ta05908a), 2024-01-01
Supplement: d3ta05908a1.pdf [file d3ta05908a1.pdf]

## **Supporting information**

### **ALD-made noble metal high entropy alloy nanofilm with sub-surface amorphization for enhanced hydrogen evolution**

Yiming Zou, Lin Jing, Jianghong Zhang, Songzhu Luo, Leyan Wang, Yun Li, Ronn  
Goei, Kwan W. Tan\* and Alfred Iing Yoong Tok\*

School of Materials Science and Engineering, Nanyang Technological University, 50  
Nanyang Avenue, Singapore 639798, Singapore

\*Corresponding authors: (K.W.T.) [kwtan@ntu.edu.sg](mailto:kwtan@ntu.edu.sg); (A.I.Y.T.) [miytok@ntu.edu.sg](mailto:miytok@ntu.edu.sg).

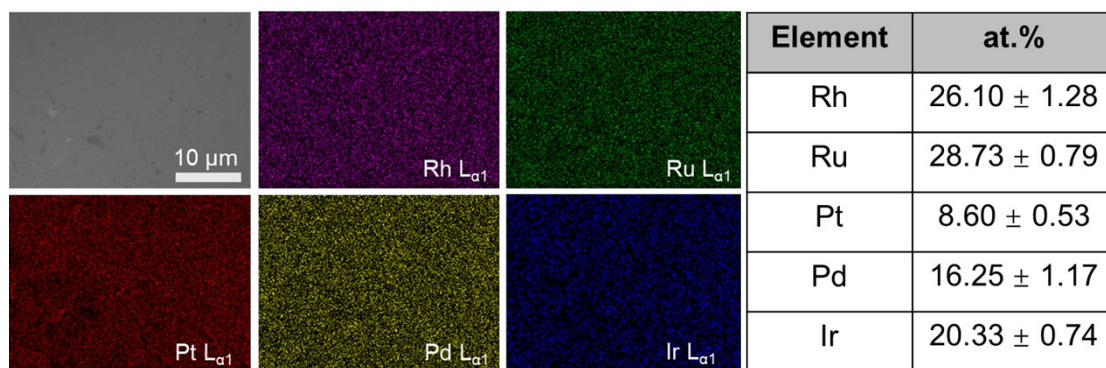

**Fig. S1** Top-view EDX mappings of HEMG/GC and corresponding atomic concentrations of Rh, Ru, Pt, Pd, and Ir. All the noble metal elements are homogeneously distributed in the detected area.

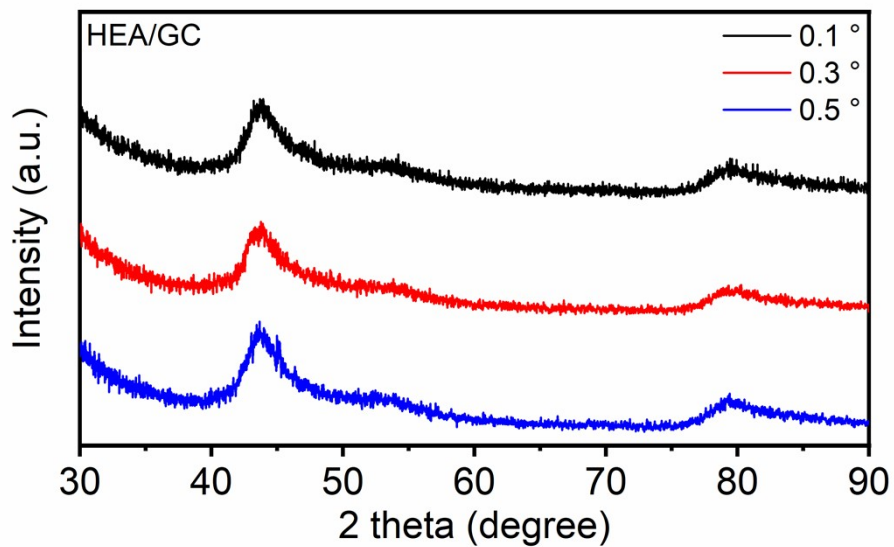

**Fig. S2** GI-XRD patterns of HEMG/GC applied with 0.1, 0.3, and 0.5 ° incidence angles, respectively. No characteristic peak is shown other than peaks from glassy carbon substrates.

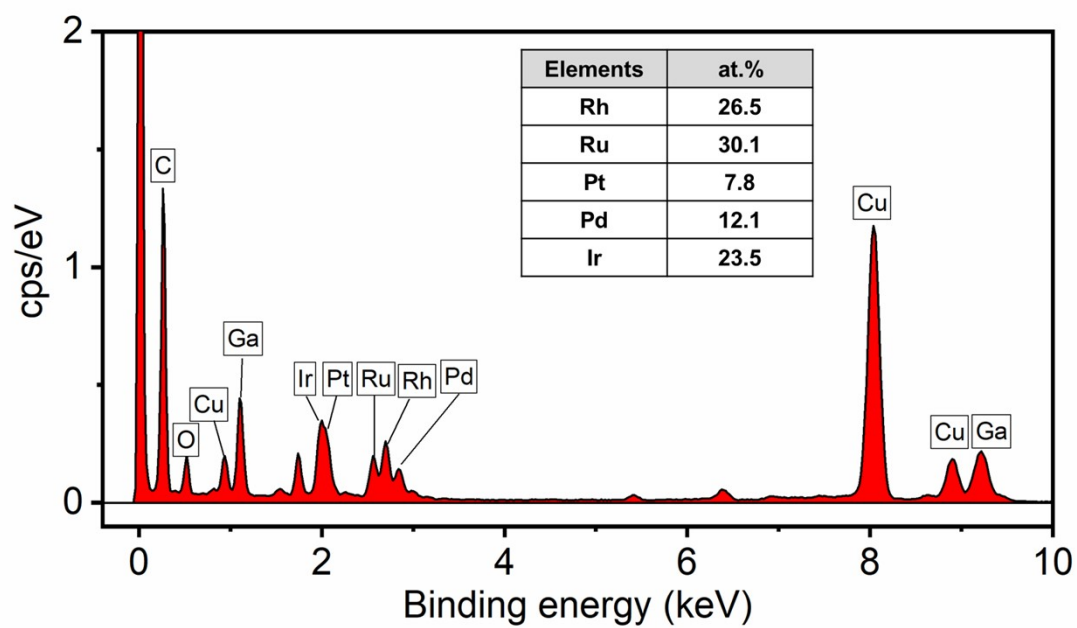

**Fig. S3** EDX spectrum and corresponding atomic ratio of the cross section randomly selected from HEMG/GC. Cu signals are caused by the copper grid, and Ga signals are caused by Ga ion beam of FIB.

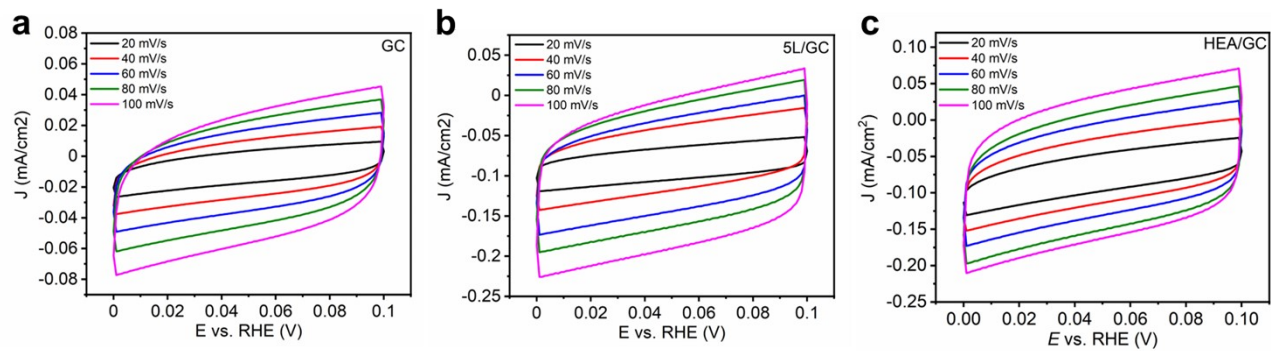

**Fig. S4** CV curves of (a) GC, (b) 5L/GC, and (c) HEA/GC in a range of 0 to 0.1 V vs. RHE with scan rates of 20, 40, 60, 80, and 100  $\text{mV}/\text{s}$  in  $0.5 \text{ M H}_2\text{SO}_4$ .

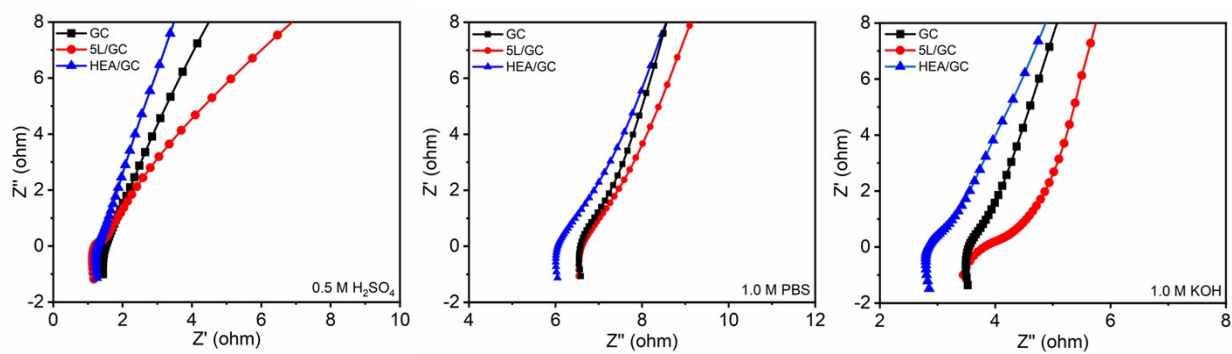

**Fig. S5** EIS curves of GC, 5L/GC, and HEA/GC in (a) 0.5 M  $H_2SO_4$ , (b) 1.0 M PBS, and (c) 1.0 M KOH.

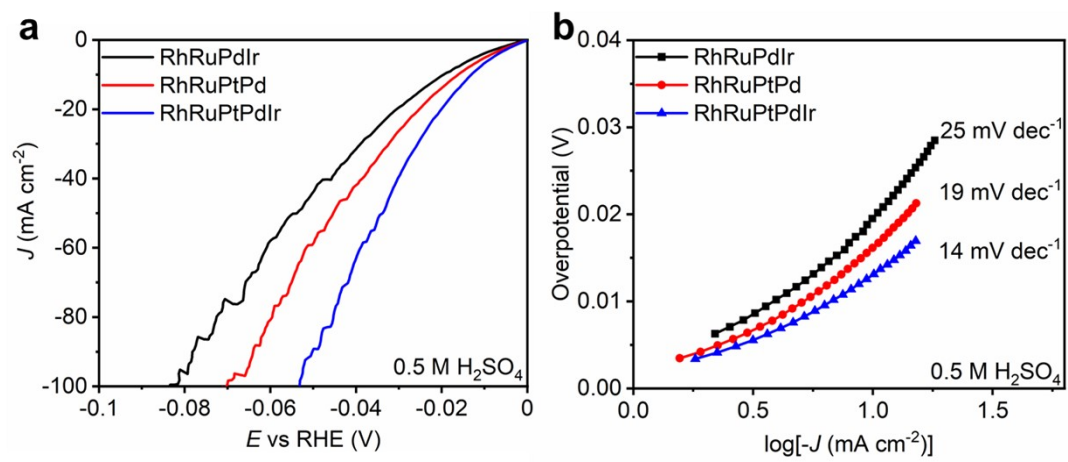

**Fig. S6** The (a) LSV curves and (b) Tafel slopes of RhRuPdIr/GC, RhRuPdPt/GC, and RhRuPtPdIr/GC in 0.5 M H<sub>2</sub>SO<sub>4</sub>.

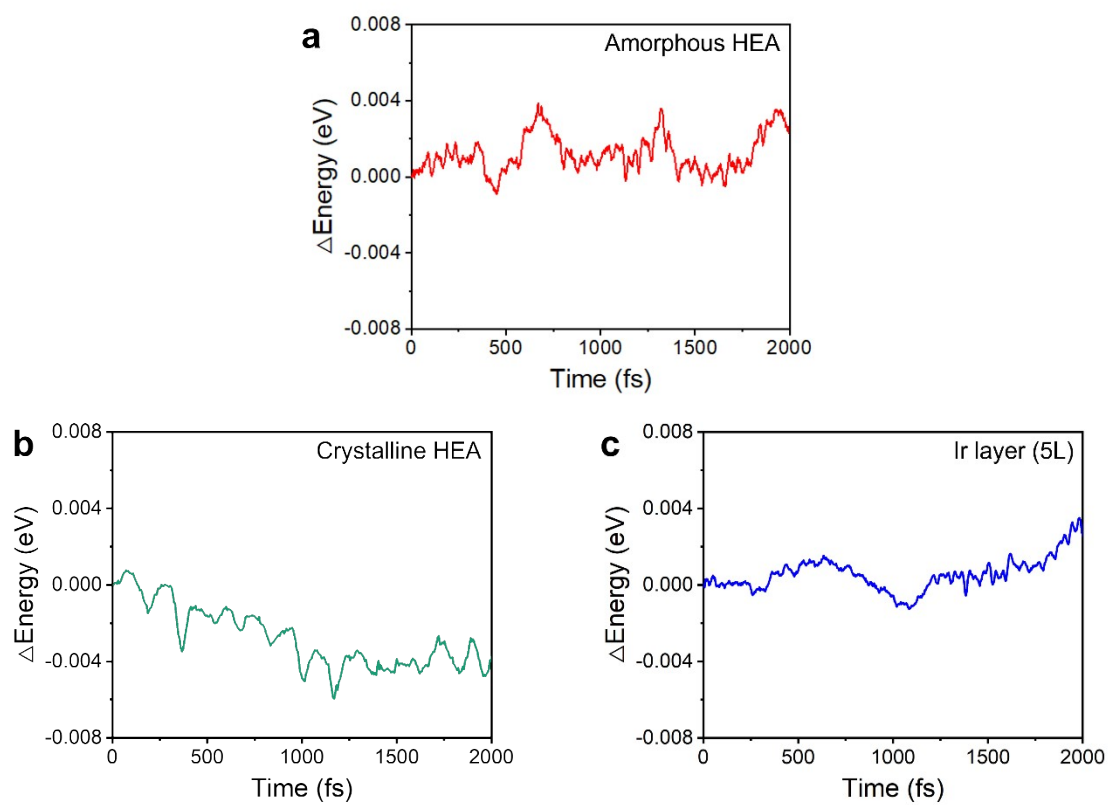

**Fig. S7** Thermodynamic stability test by AIMD simulations. The energy change vs. time of (a) amorphous HEA, (b) crystalline HEA and (c) Ir layer (5L).



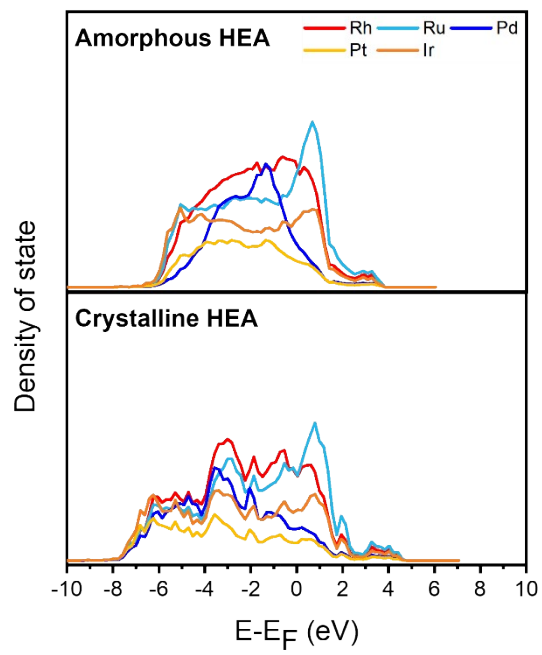

**Fig. S8** PDOS of Rh, Ru, Pt, Pd, and Ir from (a) amorphous HEA and (b) crystalline HEA

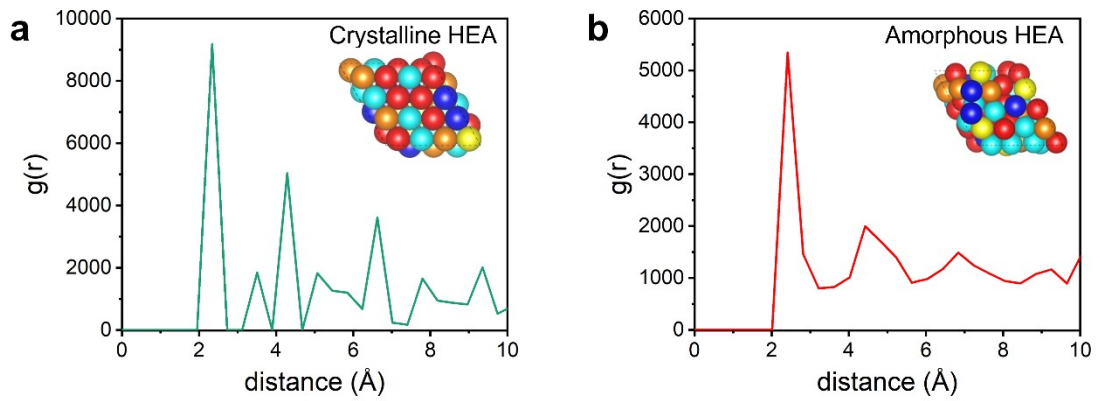

**Fig. S9** Radial distribution function diagram of (a) crystalline HEA, (b) amorphous HEA (Inset: top view from [111] direction). The broader and smoother peaks exhibited by amorphous HEA indicates a transition from an ordered to a disordered structure.

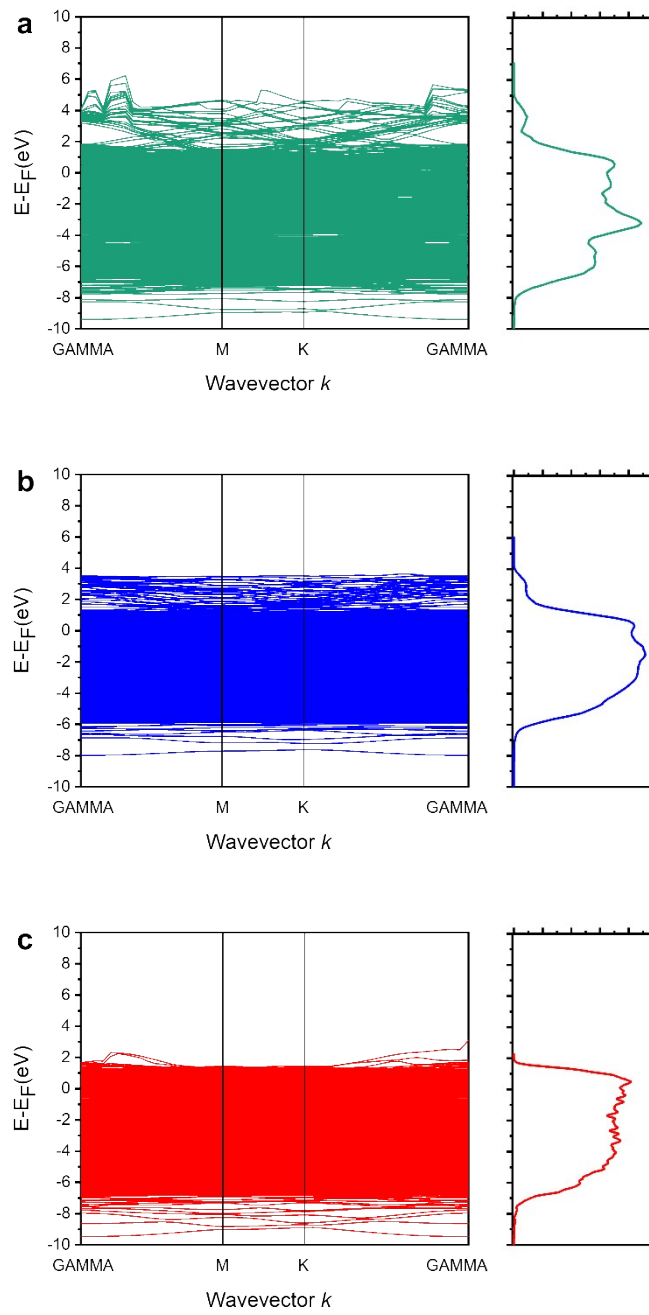

**Fig. S10** Band structure of (a) crystalline HEA, (b) amorphous HEA and (c) Ir layer (5L).

**Table S1** The binding energy of the major components identified in XPS spectra.

| Elements          | Bindings | Electrons         | Binding energy (eV) |
|-------------------|----------|-------------------|---------------------|
| Rh                | M-M      | 3d <sub>3/2</sub> | 312.0               |
|                   |          | 3d <sub>5/2</sub> | 307.2               |
|                   | M-O      | 3d <sub>3/2</sub> | 312.9               |
|                   |          | 3d <sub>3/2</sub> | 308.1               |
| Ru                | M-M      | 3d <sub>3/2</sub> | 284.3               |
|                   |          | 3d <sub>5/2</sub> | 280.0               |
|                   | M-O      | 3d <sub>3/2</sub> | 284.7               |
|                   |          | 3d <sub>5/2</sub> | 280.5               |
| Pt                | M-M      | 4f <sub>5/2</sub> | 74.5                |
|                   |          | 4f <sub>7/2</sub> | 71.2                |
|                   |          | 4d <sub>5/2</sub> | 315.0               |
|                   | M-O      | 4f <sub>5/2</sub> | 75.4                |
| 4f <sub>7/2</sub> |          | 72.1              |                     |
| Pd                | M-M      | 3d <sub>3/2</sub> | 340.7               |
|                   |          | 3d <sub>5/2</sub> | 335.4               |
|                   |          | 2p <sub>3/2</sub> | 532.9               |
|                   | M-O      | 3d <sub>3/2</sub> | 341.8               |
| 3d <sub>5/2</sub> |          | 336.3             |                     |
| Ir                | M-M      | 4f <sub>5/2</sub> | 63.7                |
|                   |          | 4f <sub>7/2</sub> | 60.7                |
|                   |          | 4d <sub>3/2</sub> | 313.2               |
|                   | M-O      | 4f <sub>5/2</sub> | 64.5                |
| 4f <sub>7/2</sub> |          | 61.4              |                     |
| C                 | C-C      | 1s                | 284.8               |
| O                 | M-OH     | 1s                | 531.9               |
|                   | M-O      | 1s                | 530.7               |
|                   | C-O      | 1s                | 533.5               |

**Table S2** Comparison of HER overpotential at 10 mA cm<sup>-2</sup> and Tafel slope in 0.5 M H<sub>2</sub>SO<sub>4</sub> for best-performing noble-metal based catalysts.

| Materials                                                                    | Overpotential @ 10mA<br>cm <sup>-2</sup> (mV) | Tafel slope (mV dec <sup>-1</sup> ) | Reference |
|------------------------------------------------------------------------------|-----------------------------------------------|-------------------------------------|-----------|
| RhRuPtPdIr                                                                   | 13                                            | 14                                  | This work |
| Pt/C                                                                         | 40                                            | 30                                  | 1         |
| Pd <sub>40</sub> Ni <sub>10</sub> Cu <sub>30</sub> P <sub>20</sub> MG        | 76                                            | 58                                  | 2         |
| AlNiCoIrMo np                                                                | 18.5                                          | 33.2                                | 3         |
| PdPtCuNiP MG                                                                 | 62                                            | 44.6                                | 4         |
| Np-UHEA14 (Al, Ag, Au, Co,<br>Cu, Fe, Ir, Mo, Ni, Pd, Pt, Rh,<br>Ru, and Ti) | 32                                            | 30.1                                | 5         |
| Pt-CoP                                                                       | 52                                            | 28.2                                | 6         |
| Pt-Ru/CNT                                                                    | 12                                            | 23                                  | 7         |
| Ru <sub>0.3</sub> Pd <sub>0.7</sub> @NPC                                     | 36                                            | 41                                  | 8         |
| Cu/Rh(SAs) +<br>Cu <sub>2</sub> Rh(NPs)/GN)                                  | 8                                             | 24                                  | 9         |
| Ni-MOF@Pt                                                                    | 43                                            | 30                                  | 10        |
| K <sub>2</sub> PtCl <sub>4</sub> @NC-M                                       | 11                                            | 21                                  | 11        |

**Table S3** Comparison of HER overpotential at 10 mA cm<sup>-2</sup> and Tafel slope in 1.0 M KOH for best-performing noble-metal based catalysts.

| Materials                                                                               | Overpotential @ 10mA<br>cm <sup>-2</sup> (mV) | Tafel slope (mV dec <sup>-1</sup> ) | Reference |
|-----------------------------------------------------------------------------------------|-----------------------------------------------|-------------------------------------|-----------|
| RhRuPtPdIr                                                                              | 66                                            | 78                                  | This work |
| Ru/C <sub>3</sub> N <sub>4</sub> /C                                                     | 79                                            | 69                                  | 12        |
| PtNi                                                                                    | 65                                            | 74                                  | 13        |
| RuO <sub>2</sub> /Co <sub>3</sub> O <sub>4</sub>                                        | 89                                            | 91                                  | 14        |
| Ru <sub>0.7</sub> Pd <sub>0.3</sub> @NPC                                                | 20                                            | 51                                  | 8         |
| Ni-MOF@Pt                                                                               | 102                                           | 88                                  | 10        |
| Ni <sub>3</sub> N/Pt                                                                    | 50                                            | 36.5                                | 15        |
| PdFeCoNiCu/C                                                                            | 18                                            | 39                                  | 16        |
| Pt <sub>18</sub> Ni <sub>26</sub> Fe <sub>15</sub> Co <sub>14</sub> Cu <sub>27</sub> /C | 11                                            | 30                                  | 17        |
| Co-substitute Ru                                                                        | 13                                            | 29                                  | 18        |
| Pt <sub>25</sub> Pd <sub>25</sub> Ni <sub>25</sub> P <sub>25</sub> MG                   | 19.8                                          | 40                                  | 19        |
| PdPtCuNiP MG                                                                            | 32                                            | 37.4                                | 4         |
| (FeCoNiB <sub>0.75</sub> ) <sub>97</sub> Pt <sub>3</sub>                                | 27                                            | 37.8                                | 20        |

## References

1. J.-S. Li, Y. Wang, C.-H. Liu, S.-L. Li, Y.-G. Wang, L.-Z. Dong, Z.-H. Dai, Y.-F. Li and Y.-Q. Lan, *Nat. Commun.*, 2016, **7**, 11204. <https://doi.org/10.1038/ncomms11204>.
2. Y. C. Hu, Y. Z. Wang, R. Su, C. R. Cao, F. Li, C. W. Sun, Y. Yang, P. F. Guan, D. W. Ding and Z. L. Wang, *Adv Mater*, 2016, **28**, 10293-10297. <https://doi.org/10.1002/adma.201603880>.
3. Z. Jin, J. Lv, H. Jia, W. Liu, H. Li, Z. Chen, X. Lin, G. Xie, X. Liu and S. Sun, *Small*, 2019, **15**, 1904180. <https://doi.org/10.1002/sml.201904180>.
4. Z. Jia, K. Nomoto, Q. Wang, C. Kong, L. Sun, L. C. Zhang, S. X. Liang, J. Lu and J. J. Kruzic, *Adv. Funct. Mater.*, 2021, **31**, 2101586. <https://doi.org/10.1002/adfm.202101586>.
5. Z.-X. Cai, H. Goou, Y. Ito, T. Tokunaga, M. Miyauchi, H. Abe and T. Fujita, *Chem. Sci.*, 2021, **12**, 11306-11315. <https://doi.org/10.1039/D1SC01981C>.
6. Y.-N. Zhou, X. Liu, C.-J. Yu, B. Dong, G.-Q. Han, H.-J. Liu, R.-Q. Lv, B. Liu and Y.-M. Chai, *J. Mater. Chem. A*, 2023, **11**, 6945-6951. <https://doi.org/10.1039/D2TA09784B>.
7. D. Zhang, Z. Wang, X. Wu, Y. Shi, N. Nie, H. Zhao, H. Miao, X. Chen, S. Li and J. Lai, *Small*, 2022, **18**, 2104559. <https://doi.org/10.1002/sml.202104559>.
8. J. Huang, C. Du, Q. Dai, X. Zhang, J. Tang, B. Wang, H. Zhou, Q. Shen and J. Chen, *J. Alloys Compd.*, 2022, **917**, 165447. <https://doi.org/10.1016/j.jallcom.2022.165447>.
9. S. Sultan, M. H. Diorizky, M. Ha, J. N. Tiwari, H. Choi, N. K. Dang, P. Thangavel, J. H. Lee, H. Y. Jeong and H. S. Shin, *J. Mater. Chem. A*, 2021, **9**, 10326-10334. <https://doi.org/10.1039/D1TA01067K>.
10. K. Rui, G. Zhao, M. Lao, P. Cui, X. Zheng, X. Zheng, J. Zhu, W. Huang, S. X. Dou and W. Sun, *Nano Lett.*, 2019, **19**, 8447-8453. <https://doi.org/10.1021/acs.nanolett.9b02729>.
11. H. Jin, S. Sultan, M. Ha, J. N. Tiwari, M. G. Kim and K. S. Kim, *Adv. Funct. Mater.*, 2020, **30**, 2000531. <https://doi.org/10.1002/adfm.202000531>.
12. Y. Zheng, Y. Jiao, Y. Zhu, L. H. Li, Y. Han, Y. Chen, M. Jaroniec and S.-Z. Qiao, *J. Am. Chem. Soc.*, 2016, **138**, 16174-16181. <https://doi.org/10.1021/jacs.6b11291>.
13. Z. Cao, Q. Chen, J. Zhang, H. Li, Y. Jiang, S. Shen, G. Fu, B.-a. Lu, Z. Xie and L. Zheng, *Nat. Commun.*, 2017, **8**, 15131. <https://doi.org/10.1038/ncomms15131>.
14. N. Wu, C. Liu, D. Xu, J. Liu, W. Liu, H. Liu, J. Zhang, W. Xie and Z. Guo, *J. Mater. Chem. C*, 2019, **7**, 1659-1669. <https://doi.org/10.1039/C8TC04984J>.
15. Y. Wang, L. Chen, X. Yu, Y. Wang and G. Zheng, *Adv. Energy Mater.*, 2017, **7**, 1601390. <https://doi.org/10.1002/aenm.201601390>.
16. D. Zhang, Y. Shi, H. Zhao, W. Qi, X. Chen, T. Zhan, S. Li, B. Yang, M. Sun and J. Lai, *J. Mater. Chem. A*, 2021, **9**, 889-893. <https://doi.org/10.1039/D0TA10574K>.
17. H. Li, Y. Han, H. Zhao, W. Qi, D. Zhang, Y. Yu, W. Cai, S. Li, J. Lai and B. Huang, *Nat. Commun.*, 2020, **11**, 5437. <https://doi.org/10.1038/s41467-020-19277-9>.
18. J. Mao, C.-T. He, J. Pei, W. Chen, D. He, Y. He, Z. Zhuang, C. Chen, Q. Peng, D. Wang and Y. Li, *Nat. Commun.*, 2018, **9**, 4958. <https://doi.org/10.1038/s41467-018-07288-6>.
19. Z. Jia, Y. Yang, Q. Wang, C. Kong, Y. Yao, Q. Wang, L. Sun, B. Shen and J. J. Kruzic, *ACS Mater. Lett.*, 2022, **4**, 1389-1396. <https://doi.org/10.1021/acsmaterialslett.2c00371>.
20. X. Zhang, Y. Yang, Y. Liu, Z. Jia, Q. Wang, L. Sun, L. C. Zhang, J. J. Kruzic, J. Lu and B. Shen, *Adv Mater*, 2023, 2303439. <https://doi.org/10.1002/adma.202303439>.
